# Supplementary material
Source: Royal Society of Chemistry journal article supplement (doi:10.1039/d6em00082g)
Supplement: d6em00082g1.pdf [file d6em00082g1.pdf]

## Supplementary materials

### **Occurrence, Spatial Variation, and Exposure Risk of Bisphenol Analogues in Drinking Water of Sichuan Province**

Authors: Jie Chen<sup>1</sup>, Zhiwei Gan<sup>1</sup>, Ruonan Wang<sup>2\*</sup>, Zhi Li<sup>1</sup>, Weiyi Sun<sup>1\*</sup>

1. College of Architecture and Environment, Sichuan University, Chengdu 610065, China

2. Sichuan Province Ecological Environment Monitoring Station, Chengdu 610074, China

\*Corresponding author:

Ruonan Wang ([441546756@qq.com](mailto:441546756@qq.com))

Weiyi Sun

Tel: +86-28-85460916

Fax: +86-28-85460916

Email: [swylsculw@163.com](mailto:swylsculw@163.com)

### **Section 1 Details on post-extraction spike method**

For recovery experiments, we prepared one composite sample per matrix. Specifically, for surface water, tap water, and bottled water, equal aliquots from several individual samples within each matrix were mixed to obtain a representative composite sample. The BP peak areas measured from randomly selected water samples were designated as A. The corresponding peak areas for standards spiked post-extraction were denoted as B, while those for standards spiked prior to extraction were labeled as C. The recovery (RE) and matrix effect (ME) were subsequently calculated according to the following equations, respectively:

$$RE=(C-A)/(B-A)\times 100\%$$

**Table S1 The physicochemical data and structures of the BPs**

| Abbreviation | Structure                                                                           | CAS NO.   | Full name                               | Molecular formula    | Log $K_{ow}^a$ | Half-life in water(day) | Water Solubility ( $mg L^{-1}$ ) <sup>b</sup> |
|--------------|-------------------------------------------------------------------------------------|-----------|-----------------------------------------|----------------------|----------------|-------------------------|-----------------------------------------------|
| BPA          | 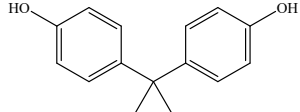   | 80-05-7   | 2,2-bis(4-hydroxyphenyl)propane         | $C_{15}H_{16}O_2$    | 3.32           | 37.5                    | 300 at 25°C                                   |
| BPAF         |    | 1478-61-1 | 4,4'-(hexafluoroisopropylidene)diphenol | $C_{15}H_{10}F_6O_2$ | 4.47           | 180                     | -                                             |
| BPAP         |   | 1571-75-1 | 4,4'-(1-phenylethylidene)bisphe-nol     | $C_{20}H_{18}O_2$    | 4.86           | 37.5                    | -                                             |
| BPB          |  | 77-40-7   | 2,2-bis(4-hydroxyphenyl)butane          | $C_{16}H_{18}O_2$    | 4.13           | 37.5                    | -                                             |

|      |                                                                                     |            |                                             |                                                |      |      |   |
|------|-------------------------------------------------------------------------------------|------------|---------------------------------------------|------------------------------------------------|------|------|---|
| BPBP | 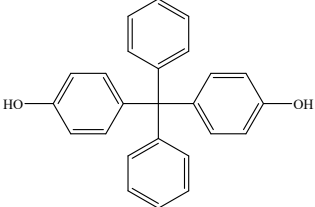   | 1844-01-5  | bis(4-hydroxyphenyl)diphenylmethane         | C <sub>25</sub> H <sub>20</sub> O <sub>2</sub> | 6.08 | 37.5 | - |
| BPC  |    | 79-97-0    | 2,2-bis(4-hydroxy-3-methylphenyl)propane    | C <sub>17</sub> H <sub>20</sub> O <sub>2</sub> | 4.74 | 37.5 | - |
| BPE  |    | 2081-08-5  | 4,4'-ethylidenebisphenol                    | C <sub>14</sub> H <sub>14</sub> O <sub>2</sub> | 3.19 | 15.0 | - |
| BPF  |    | 620-92-8   | 4,4'-methylenedi-phenol                     | C <sub>13</sub> H <sub>12</sub> O <sub>2</sub> | 3.06 | 15.0 | - |
| BPG  |   | 127-54-8   | 2,2-bis(4-hydroxy-3-isopropylphenyl)propane | C <sub>21</sub> H <sub>28</sub> O <sub>2</sub> | 6.55 | 37.5 | - |
| BPM  |  | 13595-25-0 | 4,4'-(1,3-phenylene)diisopropylide          | C <sub>24</sub> H <sub>26</sub> O <sub>2</sub> | 6.25 | 60.0 | - |

|      |                                                                                    |            |                                                               |                        |      |      |           |
|------|------------------------------------------------------------------------------------|------------|---------------------------------------------------------------|------------------------|------|------|-----------|
| BPP  | 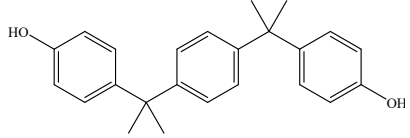  | 2167-51-3  | ne)bisphenol<br>4,4'-(1,4-phenylenediisopropylidene)bisphenol | $C_{24}H_{26}O_2$      | 6.25 | 60.0 | -         |
| BPS  |   | 80-09-1    | 4-hydroxyphenyl sulfone                                       | $C_{12}H_{10}O_4$<br>S | 1.65 | 15.0 | Insoluble |
| BPZ  |   | 843-55-0   | 4,4'-cyclohexylidenebisphenol                                 | $C_{18}H_{20}O_2$      | 5    | 37.5 | -         |
| BPPH |  | 24038-68-4 | 2,2-bis(2-hydroxy-5-phenyl)propane                            | $C_{27}H_{24}O_2$      | 7.17 | 37.5 | -         |

<sup>a</sup>  $K_{ow}$ : Octanol-water partition coefficient, data collected from Chen. et al., 2025. <sup>b</sup> Water Solubility: data collected from pubchem.com.

Chen, D., Kannan, K., Tan, H., Zheng, Z., Feng, Y.-L., Wu, Y., & Widelka, M. (2016). Bisphenol Analogues Other Than BPA: Environmental Occurrence, Human Exposure, and Toxicity—A Review. *Environmental Science & Technology*, 50(11), 5438-5453. doi:10.1021/acs.est.5b05387

**Table S2 Geographical information of the surface water sampling sites**

| Type           | Sampling sites | Longitude(° E) | Latitude(° N) | Economic zone <sup>a</sup> |
|----------------|----------------|----------------|---------------|----------------------------|
| river          | S1             | 104.0833       | 30.7          | CPEZ<br>(Chengdu city)     |
| river          | S2             | 103.8775       | 30.7497       | CPEZ<br>(Chengdu city)     |
| river          | S3             | 103.80917      | 30.94722      | CPEZ<br>(Chengdu city)     |
| lake-reservoir | S4             | 104.33333      | 29.4667       | SSEZ                       |
| lake-reservoir | S5             | 101.45861      | 26.52139      | PXEZ                       |
| river          | S6             | 105.4          | 28.8667       | SSEZ                       |
| river          | S7             | 105.46404      | 28.9135       | SSEZ                       |
| river          | S8             | 105.45694      | 28.89278      | SSEZ                       |
| river          | S9             | 104.19414      | 31.29351      | CPEZ                       |
| lake-reservoir | S10            | 104.77889      | 31.5353       | CPEZ                       |
| river          | S11            | 104.71806      | 31.5181       | CPEZ                       |
| lake-reservoir | S12            | 105.60761      | 32.51983      | NESEZ                      |
| river          | S13            | 105.8272       | 32.5533       | NESEZ                      |
| river          | S14            | 105.4883       | 30.6072       | CPEZ                       |
| river          | S15            | 105.4677       | 30.6349       | CPEZ                       |
| lake-reservoir | S16            | 104.62444      | 29.61611      | SSEZ                       |
| river          | S17            | 105.00111      | 29.6425       | SSEZ                       |
| river          | S18            | 104.95638      | 29.7417       | SSEZ                       |
| river          | S19            | 103.63639      | 29.65806      | CPEZ                       |
| river          | S20            | 103.65583      | 29.51056      | CPEZ                       |
| river          | S21            | 106.18365      | 30.93972      | NESEZ                      |
| river          | S22            | 106.14133      | 30.8565       | NESEZ                      |
| river          | S23            | 104.52389      | 28.79444      | SSEZ                       |
| river          | S24            | 104.49434      | 28.67381      | SSEZ                       |
| river          | S25            | 106.64694      | 30.5117       | NESEZ                      |
| river          | S26            | 107.56272      | 31.3144       | NESEZ                      |
| river          | S27            | 106.74138      | 31.8936       | NESEZ                      |
| lake-reservoir | S28            | 106.88         | 31.9          | NESEZ                      |
| river          | S29            | 102.95639      | 29.99028      | CPEZ                       |
| lake-reservoir | S30            | 104.0425       | 30.0575       | CPEZ                       |
| river          | S31            | 103.3405       | 29.9184       | CPEZ                       |
| lake-reservoir | S32            | 104.49333      | 30.1691       | CPEZ                       |
| river          | S33            | 102.24942      | 31.8876       | NWSEEZ                     |
| river          | S34            | 102.30361      | 32.00444      | NWSEEZ                     |

|                |     |           |          |        |
|----------------|-----|-----------|----------|--------|
| river          | S35 | 102.27861 | 31.96556 | NWSEEZ |
| river          | S36 | 102.28139 | 31.96389 | NWSEEZ |
| river          | S37 | 102.27972 | 31.955   | NWSEEZ |
| river          | S38 | 102.26056 | 31.9325  | NWSEEZ |
| river          | S39 | 102.2502  | 31.9176  | NWSEEZ |
| river          | S40 | 101.95333 | 30.0275  | NWSEEZ |
| river          | S41 | 101.9595  | 29.91815 | NWSEEZ |
| river          | S42 | 101.96611 | 29.98586 | NWSEEZ |
| river          | S43 | 101.96735 | 30.04543 | NWSEEZ |
| river          | S44 | 102.27667 | 27.9375  | PXEZ   |
| lake-reservoir | S45 | 102.32982 | 27.804   | PXEZ   |

**<sup>a</sup>Economic zone: Chengdu Plain Economic Zone (CPEZ), South Sichuan Economic Zone (SSEZ), Northeast Sichuan Economic Zone (NESEZ), Panxi Economic Zone (PXEZ), and Northwest Sichuan Ecological Economic Zone (NWSEEZ).**

**Table S3 information for bottled water samples**

| Samples | Water type              | Procedure origin | Package material           |
|---------|-------------------------|------------------|----------------------------|
| B1      | Natural mineral water   | national         | Polyethylene terephthalate |
| B2      | Packaged drinking water | local            | Polyethylene terephthalate |
| B3      | Purified drinking water | local            | Polyethylene terephthalate |
| B4      | Natural mineral water   | local            | Polyethylene terephthalate |
| B5      | Purified drinking water | local            | Polyethylene terephthalate |
| B6      | Natural drinking water  | local            | Polyethylene terephthalate |
| B7      | Natural mineral water   | national         | Polyethylene terephthalate |
| B8      | Natural mineral water   | local            | Polyethylene terephthalate |

**Table S4 Mass spectrometer parameters for the determination of the target compounds**

| Name    | Retention time (min) | Precursor ion (m/z) <sup>a</sup> | Daughter ions | DP <sup>b</sup> (volts) | EP <sup>c</sup> (volts) | CE <sup>d</sup> (volts) | CXP <sup>e</sup> (volts) | Corresponding internal standard |
|---------|----------------------|----------------------------------|---------------|-------------------------|-------------------------|-------------------------|--------------------------|---------------------------------|
| BPA     | 4.57                 | 227.1                            | 133.1         | -85                     | -10                     | -35                     | -9                       | BPA-d16                         |
|         |                      |                                  | 212           | -85                     | -10                     | -25                     | -9                       |                                 |
| BPA-d16 | 4.53                 | 338.9                            | 268.7         | -100                    | -9                      | -31                     | -14                      |                                 |
| BPAF    | 5.98                 | 335                              | 265           | -97                     | -9                      | -31                     | -14                      | BPAF-d4                         |
|         |                      |                                  | 314.8         | -97                     | -9                      | -25                     | -16                      |                                 |

|               |      |       |       |      |     |     |     |                                    |
|---------------|------|-------|-------|------|-----|-----|-----|------------------------------------|
| BPAF-d4       | 5.97 | 338.9 | 268.7 | -100 | -9  | -31 | -14 |                                    |
| BPAP          | 5.42 | 289   | 274.1 | -130 | -10 | -28 | -8  | BPA-d16                            |
|               |      |       | 211.1 | -132 | -10 | -34 | -8  |                                    |
| BPB           | 5.02 | 240.9 | 211.2 | -85  | -9  | -37 | -9  | BPA-d16                            |
|               |      |       | 225.9 | -85  | -9  | -25 | -10 |                                    |
| BPBP          | 5.95 | 351.1 | 273.2 | -97  | -10 | -35 | -13 | BPAF-d4                            |
|               |      |       | 258.1 | -97  | -10 | -33 | -13 |                                    |
| BPC           | 5.47 | 255.3 | 146.8 | -100 | -9  | -34 | -5  | BPA-d16                            |
|               |      |       | 240   | -100 | -9  | -27 | -11 |                                    |
| BPE           | 4.14 | 213.1 | 118.9 | -82  | -10 | -33 | -8  | BPA-d16                            |
|               |      |       | 197.2 | -82  | -10 | -36 | -8  |                                    |
| BPF           | 3.73 | 199.2 | 104.8 | -88  | -9  | -28 | -5  | BPF-d10                            |
|               |      |       | 93    | -88  | -9  | -30 | -5  |                                    |
| BPF-d10       | 3.66 | 209.3 | 110.2 | -90  | -9  | -30 | -5  |                                    |
| BPG           | 6.61 | 311.2 | 296.1 | -115 | -9  | -31 | -14 | BPAF-d4                            |
|               |      |       | 175   | -115 | -9  | -42 | -7  |                                    |
| BPM           | 6.71 | 345.2 | 251.2 | -120 | -9  | -41 | -11 | BPAF-d4                            |
|               |      |       | 133.1 | -120 | -9  | -54 | -8  |                                    |
| BPP           | 6.71 | 345.2 | 330   | -130 | -9  | -35 | -12 | BPAF-d4                            |
|               |      |       | 315.1 | -130 | -9  | -48 | -15 |                                    |
| BPPH          | 6.98 | 379.1 | 209   | -133 | -9  | -47 | -10 | BPAF-d4                            |
|               |      |       | 363.2 | -124 | -9  | -50 | -8  |                                    |
| BPS           | 2.5  | 249   | 108   | -90  | -9  | -36 | -6  | BPS- <sup>13</sup> C <sub>12</sub> |
|               |      |       | 92    | -90  | -10 | -48 | -6  |                                    |
| BPS-<br>13C12 | 2.5  | 261   | 97.8  | -90  | -10 | -48 | -6  |                                    |
| BPZ           | 5.53 | 267.2 | 173   | -102 | -8  | -35 | -12 | BPA-d16                            |
|               |      |       | 145.1 | -102 | -8  | -49 | -9  |                                    |

---

**a: In sequence, they are quantitative ions and qualitative ions. DP<sup>b</sup>: Declustering Potential; EP<sup>c</sup>: Entrance Potential; CE<sup>d</sup>: Collision Energy; CXP<sup>e</sup>: Collision Cell Exit Potential.**

**Table S5 Gradient programs for the analysis of the BPs**

| Time (min) | Flow rate ( $\mu\text{L}/\text{min}$ ) | Mobile phase A <sup>a</sup> | Mobile phase B <sup>b</sup> |
|------------|----------------------------------------|-----------------------------|-----------------------------|
|            |                                        | (%)                         | (%)                         |
| 0          | 400                                    | 60                          | 40                          |
| 1          | 400                                    | 60                          | 40                          |
| 6          | 400                                    | 20                          | 80                          |
| 6.1        | 400                                    | 0                           | 100                         |
| 8.5        | 400                                    | 0                           | 100                         |
| 8.6        | 400                                    | 60                          | 40                          |
| 11         | 400                                    | 40                          | 40                          |

a: Milli-Q water ; b: Methanol

**Table S6 The method validation of the target compounds**

| Analyte | External calibration<br>$R^2$ | MDLs <sup>a</sup><br>( $\text{ng L}^{-1}$ ) | MQLs <sup>b</sup><br>( $\text{ng L}^{-1}$ ) | Recovery<br>(RSD) (%)<br>n=3 |
|---------|-------------------------------|---------------------------------------------|---------------------------------------------|------------------------------|
| BPA     | 0.999                         | 0.043                                       | 0.144                                       | 87.3(23.6)                   |
| BPAF    | 0.995                         | 0.003                                       | 0.009                                       | 87.6(10.0)                   |
| BPAP    | 0.999                         | 0.007                                       | 0.024                                       | 94.1(17.2)                   |
| BPB     | 0.999                         | 0.022                                       | 0.072                                       | 110(7.57)                    |
| BPBP    | 0.998                         | 0.009                                       | 0.029                                       | 63.3(38.1)                   |
| BPC     | 0.999                         | 0.206                                       | 0.688                                       | 97.3(50.2)                   |
| BPE     | 0.999                         | 0.019                                       | 0.064                                       | 96.3(14.3)                   |
| BPF     | 0.999                         | 0.06                                        | 0.2                                         | 95.5(3.54)                   |
| BPG     | 0.997                         | 0.146                                       | 0.488                                       | 50.0(68.4)                   |
| BPM     | 0.992                         | 0.008                                       | 0.025                                       | 66.9(44.6)                   |
| BPP     | 0.993                         | 0.004                                       | 0.014                                       | 67.0(44.3)                   |
| BPPH    | 0.999                         | 0.098                                       | 0.328                                       | 39.5(79.3)                   |
| BPS     | 0.999                         | 0.002                                       | 0.08                                        | 147(46.8)                    |
| BPZ     | 0.999                         | 0.038                                       | 0.128                                       | 100(18.7)                    |

a: method detection limits, b: method quantitation limits.

**Table S7 The concentration of the target compounds in water samples in Sichuan, China. Values are in ng L<sup>-1</sup>.**

| name | BPA  | BPAF   | BPAP   | BPB    | BPBP   | BPC   | BPE    | BPF   | BPG   | BPM    | BPP    | BPPH  | BPS   | BPZ    | ΣBP  |
|------|------|--------|--------|--------|--------|-------|--------|-------|-------|--------|--------|-------|-------|--------|------|
| S1   | 5.34 | 0.133  | 0.12   | ND     | 0.166  | ND    | 0.106  | 0.12  | 0.53  | 0.027  | 0.0299 | 0.197 | 0.79  | 0.0992 | 7.66 |
| S2   | 3.76 | 0.127  | 0.092  | ND     | 0.15   | ND    | ND     | 0.345 | ND    | 0.016  | 0.0388 | 0.33  | 4.87  | 0.114  | 9.84 |
| S3   | 1.91 | 0.0514 | 0.0571 | ND     | 0.0786 | 0.413 | ND     | 0.12  | ND    | 0.016  | 0.008  | ND    | 17.2  | 0.084  | 19.9 |
| S4   | 2.95 | 0.128  | 0.146  | 0.044  | 0.23   | 0.659 | 1.02   | 0.12  | 1.27  | 0.279  | 0.365  | 1.19  | 1.19  | 0.138  | 9.73 |
| S5   | 5.12 | 0.0822 | 0.133  | ND     | 0.324  | ND    | 0.0758 | 0.37  | 0.293 | 0.016  | 0.0194 | ND    | 1.02  | 0.0629 | 7.52 |
| S6   | 16.2 | 0.231  | 0.0725 | ND     | 0.0456 | 0.413 | 13.3   | 0.318 | 0.293 | 0.016  | 0.0162 | 0.197 | 1.86  | 0.0646 | 33   |
| S7   | 25.3 | 0.188  | 0.0833 | ND     | 0.0773 | ND    | 0.0687 | 1.7   | 0.293 | 0.026  | 0.0471 | 0.603 | 2.12  | 0.0655 | 30.5 |
| S8   | 11.4 | 0.29   | 0.0807 | 0.044  | 0.0993 | 0.413 | 0.0384 | 0.374 | 0.293 | 0.0479 | 0.0682 | 0.197 | 1.47  | 0.0819 | 14.9 |
| S9   | 3.9  | 0.176  | 0.1    | ND     | 0.119  | ND    | 0.0912 | 0.333 | 0.293 | 0.016  | 0.102  | 0.479 | 1.42  | 0.132  | 7.16 |
| S10  | 5.58 | 0.071  | 0.109  | ND     | 0.113  | ND    | 0.0384 | 0.214 | 0.293 | 0.016  | 0.0208 | ND    | 9.2   | 0.0896 | 15.7 |
| S11  | 22   | 0.0791 | 0.096  | ND     | 0.276  | ND    | 0.0384 | 0.386 | 0.293 | 0.0976 | 0.131  | 0.727 | 4.8   | 0.135  | 29.1 |
| S12  | 3.96 | 0.0872 | 0.0726 | 0.0864 | 0.08   | ND    | 0.0733 | 0.12  | 0.293 | 0.0299 | 0.0274 | ND    | 1.3   | 0.128  | 6.25 |
| S13  | 7.4  | 0.0453 | 0.159  | ND     | 0.164  | ND    | 0.0659 | 0.12  | 0.293 | 0.016  | 0.0274 | 0.197 | 1.65  | 0.0732 | 10.2 |
| S14  | 3.44 | 0.977  | 0.0952 | ND     | 0.0824 | ND    | 0.213  | 0.246 | 0.293 | 0.016  | 0.008  | ND    | 1.8   | 0.161  | 7.33 |
| S15  | 3.22 | 1.18   | 0.0626 | ND     | 0.118  | ND    | 0.199  | 0.394 | 0.293 | 0.0265 | 0.0323 | 0.197 | 38.9  | 0.129  | 44.7 |
| S16  | 1.37 | 0.0705 | 0.145  | ND     | 0.0641 | 0.413 | 0.0384 | 0.12  | 0.293 | 0.016  | 0.0562 | 0.197 | 0.465 | 0.0438 | 3.29 |
| S17  | 3.05 | 0.268  | 0.096  | ND     | 0.152  | ND    | 0.0384 | 0.12  | 0.293 | 0.0408 | 0.078  | 0.414 | 2.14  | 0.137  | 6.82 |
| S18  | 2.38 | 0.0946 | 0.088  | 0.044  | 0.244  | 0.413 | 2      | 0.12  | 0.968 | 0.0531 | 0.054  | 0.88  | 2.12  | 0.0896 | 9.54 |
| S19  | 35.3 | 0.415  | 0.0458 | ND     | 0.179  | ND    | ND     | 1.92  | 0.293 | 0.027  | 0.008  | 0.197 | 2.32  | 0.0816 | 40.8 |
| S20  | 3.38 | 0.0897 | 0.113  | ND     | 0.397  | 0.413 | 0.0384 | 0.245 | 0.293 | 0.058  | 0.109  | 0.197 | 2.54  | 0.0808 | 7.96 |
| S21  | 6.14 | 0.0767 | 0.231  | ND     | 0.0472 | ND    | 0.106  | 0.12  | ND    | 0.0253 | 0.0274 | 0.197 | 0.654 | 0.0896 | 7.72 |
| S22  | 13.6 | 0.0646 | 0.0293 | 0.044  | 0.0574 | 0.413 | 0.0976 | 0.621 | 0.293 | 0.027  | 0.029  | ND    | 0.297 | 0.0808 | 15.7 |
| S23  | 39.1 | 1.5    | 0.246  | 0.044  | 0.698  | 0.413 | 0.278  | 1.3   | 0.293 | 0.0755 | 0.137  | 0.559 | 13.3  | 0.0872 | 58   |
| S24  | 1.38 | 0.0759 | 0.084  | ND     | 0.134  | 0.413 | 0.0384 | 0.12  | 0.293 | 0.0576 | 0.0682 | 0.197 | 0.576 | 0.102  | 3.53 |

|     |       |        |        |        |        |       |        |       |       |        |        |       |       |        |      |
|-----|-------|--------|--------|--------|--------|-------|--------|-------|-------|--------|--------|-------|-------|--------|------|
| S25 | 62.7  | 0.172  | 0.0331 | ND     | 0.0464 | 0.413 | 0.283  | 6.01  | 0.293 | 0.0261 | 0.0394 | 0.197 | 0.662 | 0.0741 | 71   |
| S26 | 2.58  | 0.0859 | 0.168  | ND     | 0.3    | ND    | 0.0384 | 0.214 | 0.293 | 0.0289 | 0.067  | 0.197 | 4.14  | 0.0872 | 8.2  |
| S27 | 21.8  | 0.0462 | 0.16   | 0.044  | 0.0848 | ND    | 0.0384 | 1.57  | 0.293 | 0.016  | 0.0214 | 0.197 | 1.45  | 0.0797 | 25.8 |
| S28 | 88    | 0.0893 | 0.582  | 0.044  | 0.018  | 0.621 | 1.03   | 2.33  | 0.717 | 0.0269 | 0.0382 | 0.493 | 4.19  | 0.0912 | 98.3 |
| S29 | 77.7  | 0.0524 | 0.0796 | ND     | 0.158  | ND    | 0.122  | 14.6  | 0.293 | 0.016  | 0.0306 | ND    | 1.05  | 0.0474 | 94.1 |
| S30 | 2.68  | 0.122  | 0.158  | ND     | 0.266  | ND    | 0.0384 | 0.12  | 0.54  | 0.035  | 0.0607 | 0.197 | 2.95  | 0.0755 | 7.24 |
| S31 | 2.57  | 0.061  | 0.0722 | ND     | 0.06   | ND    | 0.0384 | 0.205 | ND    | 0.016  | 0.008  | 0.197 | 8.8   | 0.0628 | 12.1 |
| S32 | 2.14  | 0.169  | 0.17   | 0.126  | 0.205  | 0.413 | ND     | 0.12  | 1.49  | 0.248  | 0.426  | 1.15  | 0.502 | 0.0751 | 7.24 |
| S33 | 1.91  | 0.0404 | 0.0318 | ND     | 0.0369 | ND    | ND     | ND    | ND    | 0.016  | 0.008  | ND    | 0.192 | 0.0572 | 2.29 |
| S34 | 7.45  | 0.041  | 0.0697 | ND     | 0.105  | ND    | 0.0384 | 0.212 | 0.293 | 0.016  | 0.0201 | ND    | 0.758 | 0.0936 | 9.09 |
| S35 | 2.38  | 0.0401 | 0.026  | ND     | 0.018  | ND    | ND     | 0.12  | 0.293 | 0.016  | 0.0278 | 0.197 | 0.159 | 0.0628 | 3.34 |
| S36 | 1.76  | 0.0691 | 0.113  | ND     | 0.0514 | ND    | 0.0384 | 0.12  | ND    | 0.016  | 0.0175 | ND    | 1.44  | 0.078  | 3.7  |
| S37 | 0.573 | 0.354  | 0.162  | 0.0952 | 0.494  | 0.413 | ND     | 0.12  | 1.53  | 0.541  | 0.642  | 1.75  | 0.598 | 0.308  | 7.58 |
| S38 | 2.79  | 0.0657 | 0.145  | ND     | 0.233  | 0.413 | ND     | 0.425 | 0.293 | 0.12   | 0.154  | 0.61  | 0.318 | 0.119  | 5.69 |
| S39 | 1.74  | 0.0332 | 0.0518 | ND     | 0.0794 | ND    | 0.0384 | 0.12  | 0.293 | 0.016  | 0.0239 | ND    | 0.207 | 0.066  | 2.67 |
| S40 | 1.45  | 0.039  | 0.0379 | ND     | 0.0706 | 0.413 | 0.0384 | 0.12  | ND    | 0.016  | 0.008  | ND    | 31.8  | 0.0641 | 34.1 |
| S41 | 1.6   | 0.0519 | 0.039  | ND     | 0.0546 | 0.413 | ND     | 0.12  | ND    | 0.016  | 0.0192 | ND    | 1.18  | 0.0799 | 3.57 |
| S42 | 1.6   | 0.067  | 0.0494 | ND     | 0.029  | ND    | 0.0384 | 0.12  | 0.293 | 0.016  | 0.008  | ND    | 0.719 | 0.0538 | 2.99 |
| S43 | 2.31  | 0.0373 | 0.0399 | ND     | 0.0677 | ND    | ND     | 0.206 | 0.293 | 0.016  | 0.008  | ND    | 1.52  | 0.0751 | 4.57 |
| S44 | 2.42  | 0.052  | 0.075  | ND     | 0.0888 | ND    | 0.0384 | 0.23  | ND    | 0.016  | 0.0168 | 0.197 | 0.449 | 0.1    | 3.69 |
| S45 | 2.34  | 0.0771 | 0.146  | 0.044  | 0.116  | ND    | 0.0774 | 0.271 | 0.293 | 0.0468 | 0.0944 | 0.197 | 0.406 | 0.0739 | 4.18 |
| T1  | 41.1  | 79.5   | 1.99   | 1.13   | 5.3    | 5.48  | 2.06   | 2.66  | 88    | 57.5   | 51     | 20.2  | 1.25  | 1.26   | 358  |
| T2  | 4.11  | 0.0606 | 0.333  | 0.101  | 0.175  | 1.29  | 2.52   | 0.12  | 1.22  | 0.016  | 0.008  | 0.197 | 0.209 | 0.0896 | 10.5 |
| T3  | 2.51  | 0.381  | 1.04   | 0.0992 | 0.438  | 6.58  | 1.98   | 0.766 | 1.84  | 0.328  | 0.398  | 1.23  | 0.165 | 0.567  | 18.3 |
| T4  | 14.5  | 0.493  | 49.7   | 0.423  | 0.603  | 20.6  | 4.02   | 1     | 1.3   | 0.338  | 0.221  | 1.06  | 1.7   | 4.62   | 101  |
| T5  | 11.9  | 1.64   | 5      | 0.944  | 3.5    | 4.1   | 3.64   | 2.2   | 4.35  | 0.593  | 1.04   | 4.82  | 0.57  | 5.09   | 49.4 |

---

|     |       |        |        |       |        |       |        |       |       |        |        |       |       |        |      |
|-----|-------|--------|--------|-------|--------|-------|--------|-------|-------|--------|--------|-------|-------|--------|------|
| T6  | 92    | 1.25   | 35.3   | 3.43  | 7.19   | 37    | 4.74   | 20.4  | 4.11  | 0.782  | 1.58   | 5.99  | 0.178 | 8.08   | 222  |
| T7  | 463   | 5.33   | 43.8   | 19.4  | 5.76   | 23.8  | 33.7   | 14.9  | 9.28  | 4.67   | 4.8    | 12.9  | 0.355 | 28.1   | 670  |
| T8  | 51.4  | 1.8    | 18.1   | 2.8   | 2.43   | 206   | 4.02   | 13.4  | 3.69  | 1.82   | 0.896  | 19.8  | 0.34  | 12.2   | 338  |
| T9  | 179   | 4.94   | 66.5   | 1.49  | 11.1   | 66.8  | 17.2   | 12.5  | 28.4  | 4.73   | 4.05   | 9.76  | 0.832 | 18.1   | 426  |
| T10 | 60.5  | 7.21   | 22.9   | 1.67  | 4.59   | 61.7  | 11     | 88.8  | 15.8  | 4.88   | 2.5    | 14.6  | 0.307 | 5.3    | 302  |
| T11 | 7.14  | 0.442  | 2.91   | 0.348 | 0.663  | 4.29  | 0.856  | 3.38  | 2.04  | 0.31   | 0.133  | 3.28  | 0.928 | 2.55   | 29.3 |
| T12 | 9.68  | 0.118  | 1.22   | 0.122 | 0.302  | 4.58  | 0.266  | 1.34  | 0.625 | 0.0816 | 0.108  | 0.88  | 0.279 | 0.675  | 20.3 |
| T13 | 626   | 0.15   | 1.07   | 0.114 | 0.618  | 1.93  | 0.198  | 31.4  | 1.04  | 0.262  | 0.313  | 1.26  | 1.01  | 0.864  | 666  |
| T14 | 193   | 0.293  | 2.78   | 0.692 | 1.46   | 2.3   | 0.41   | 4     | 1.49  | 0.544  | 0.685  | 3.76  | 0.574 | 1.2    | 213  |
| T15 | 46    | 0.184  | 0.63   | 0.044 | 0.246  | 0.413 | 0.0384 | 2.64  | 0.293 | 0.0832 | 0.227  | ND    | 1.22  | 0.0725 | 52.1 |
| B1  | 23.2  | 0.114  | 0.196  | ND    | 0.312  | 0.758 | ND     | 1.29  | 0.293 | 0.0848 | 0.0628 | 0.197 | 0.483 | 0.139  | 27.1 |
| B2  | 26.7  | 0.0438 | 0.0912 | ND    | 0.233  | ND    | ND     | 1.92  | 0.293 | 0.0608 | 0.0744 | 0.397 | 0.462 | 0.0848 | 30.4 |
| B3  | 16.8  | 0.0521 | 0.114  | ND    | 0.206  | ND    | ND     | 0.688 | ND    | 0.0928 | 0.114  | 0.824 | 0.351 | 0.0912 | 19.3 |
| B4  | 0.808 | 0.0414 | 0.0872 | ND    | 0.282  | ND    | ND     | 0.12  | 0.293 | 0.0481 | 0.0692 | 0.357 | 0.54  | 0.0872 | 2.73 |
| B5  | 1.3   | 0.0522 | 0.0746 | 0.044 | 0.114  | ND    | ND     | 0.236 | 0.293 | 0.0422 | 0.0354 | ND    | 0.537 | 0.0782 | 2.8  |
| B6  | 33.3  | 0.061  | 0.277  | 0.044 | 0.45   | ND    | ND     | 2.5   | 0.293 | 0.0276 | 0.025  | 0.197 | 0.936 | 0.075  | 38.2 |
| B7  | 24.9  | 0.0365 | 0.106  | ND    | 0.0912 | ND    | ND     | 1.66  | 0.293 | 0.0334 | 0.0186 | 0.197 | 0.33  | 0.053  | 27.7 |
| B8  | 22.6  | 0.0438 | 0.11   | ND    | 0.17   | 0.413 | ND     | 1.11  | ND    | 0.016  | 0.0151 | ND    | 0.474 | 0.0647 | 25.1 |

---

**Table S8 Toxicological data and predicted no-effect concentration (PNEC) values of the target BPs**

| Compound | PNEC(ng L <sup>-1</sup> ) | Reference           |
|----------|---------------------------|---------------------|
| BPA      | 647                       | (Wang et al., 2025) |
| BPAF     | 122                       | (Wang et al., 2025) |
| BPAP     | 58                        | (Wang et al., 2025) |
| BPB      | 275                       | (Wang et al., 2025) |
| BPBP     | 6                         | (Wang et al., 2025) |
| BPC      | 94                        | (Wang et al., 2025) |
| BPE      | 699                       | (Wang et al., 2025) |
| BPF      | 778                       | (Wang et al., 2025) |
| BPG      | 6                         | (Wang et al., 2025) |
| BPM      | 12                        | (Wang et al., 2025) |
| BPP      | 14                        | (Wang et al., 2025) |
| BPPH     | NF <sup>a</sup>           |                     |
| BPS      | 5366                      | (Wang et al., 2025) |
| BPZ      | 104                       | (Wang et al., 2025) |

a: not found.

Wang, S., Peng, C., Sheng, N., Lian, L., Dai, J., & Guan, X. (2025). Occurrence, ecological risk and estrogenic effect of 19 bisphenol analogues in the surface water used for drinking water in Shanghai, China. *Water Res.*, 279, 123408. doi:10.1016/j.watres.2025.123408

**Table S9 The estradiol equivalency factor (EEF<sub>1</sub>) values of the target BPs**

| Compound | Value                | Reference                |
|----------|----------------------|--------------------------|
| BPA      | 1.93E <sup>-03</sup> | (Nishihara et al., 2000) |
| BPAF     | 7.74E <sup>-03</sup> | (Nishihara et al., 2000) |
| BPAP     | 8.03E <sup>-04</sup> | (Nishihara et al., 2000) |
| BPB      | 5.93E <sup>-03</sup> | (Nishihara et al., 2000) |
| BPC      | 1.29E <sup>-03</sup> | (Nishihara et al., 2000) |
| BPE      | 7.15E <sup>-04</sup> | (Nishihara et al., 2000) |
| BPF      | 7.19E <sup>-04</sup> | (Nishihara et al., 2000) |
| BPP      | 1.18E <sup>-3</sup>  | (Nishihara et al., 2000) |
| BPPH     | NF <sup>a</sup>      |                          |
| BPS      | 5.50E <sup>-05</sup> | (Nishihara et al., 2000) |
| BPZ      | 2.12E <sup>-03</sup> | (Nishihara et al., 2000) |
| BPBP     | NF <sup>a</sup>      |                          |
| BPG      | NF <sup>a</sup>      |                          |
| BPM      | NF <sup>a</sup>      |                          |

a: not found.

Nishihara, T., Nishikawa, J.-i., Kanayama, T., Dakeyama, F., Saito, K., Imagawa, M., . . . Utsumi, H. (2000). Estrogenic Activities of 517 Chemicals by Yeast Two-Hybrid Assay. *JOURNAL OF HEALTH SCIENCE*, 46(4), 282-298. doi:10.1248/jhs.46.282

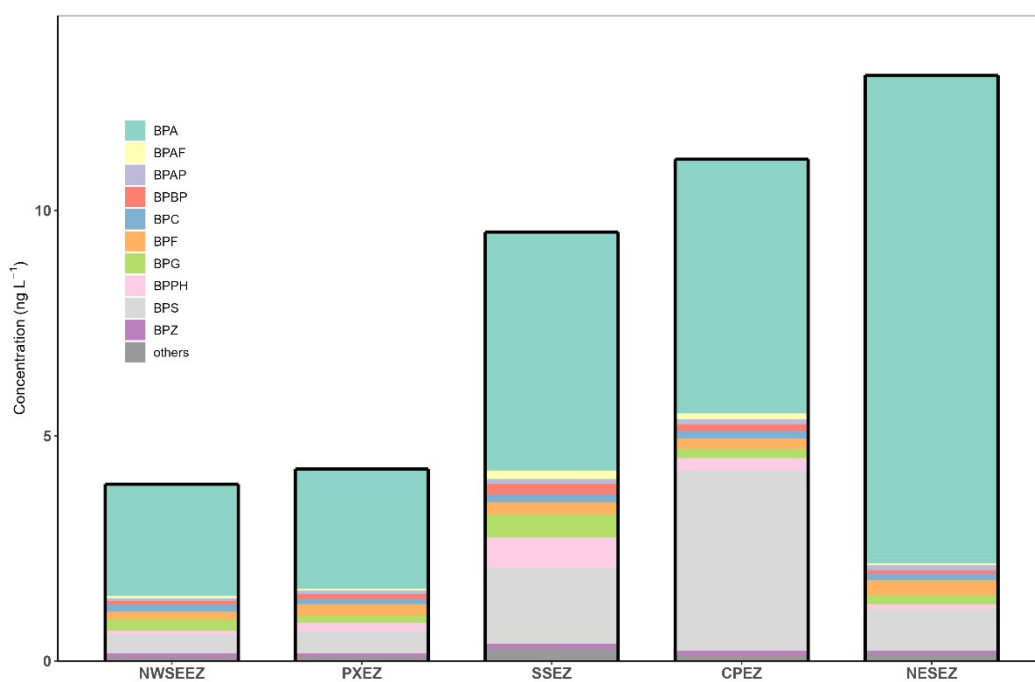

**Fig. S1 Distribution patterns of the BPs in five economic zones(BPs with contributions below 1% were combined into others). The aggregated BP concentration for each economic zone is the median of total BPs (sum of all analogues) across samples in that zone. The stacked bars represent the median percentage contributions of individual analogues after normalization.**
